# Supplementary material
Source: MDPI journal article supplement (https://www.mdpi.com/2220-9964/11/4/257)
Supplement: s1 [file s1]

# Assessment of Groundwater Potential Zones Using GIS and Fuzzy AHP Techniques – A Case Study of the Titel Municipality (Northern Serbia)

Mirjana Radulović<sup>1\*</sup>, Sanja Brdar<sup>1</sup>, Minučer Mesaroš<sup>2\*</sup>, Tin Lukić<sup>2</sup>, Stevan Savić<sup>2</sup>, Biljana Basarin<sup>2</sup>, Vladimir Crnojević<sup>1</sup> and Dragoslav Pavić<sup>2</sup>

<sup>1</sup> BioSense Institute – the Research and Development Institute for Information Technologies in Biosystems, Zorana Đinđića 1, 21000 Novi Sad, Serbia; mirjana.radulovic@biosense.rs (M.R.), sanja.brdar@biosense.rs (S.B.), crnojevic@biosense.rs (V.C.)  
<sup>2</sup> Faculty of Sciences, Department of Geography, Tourism and Hotel Management, University of Novi Sad, Trg Dositeja Obradovića 3, 21000 Novi Sad, Serbia; minucer.mesaros@dgt.uns.ac.rs (M.M.), tin.lukic@dgt.uns.ac.rs (T.L.), stevan.savic@dgt.uns.ac.rs (S.S.), biljana.basarin@dgt.uns.ac.rs (B.B.), dragoslav.pavic@dgt.uns.ac.rs (D.P.)  
\* Correspondence: mirjana.radulovic@biosense.rs (M.R.); Tel.: +381-(69)511-0235

## Supplementary Materials

Table S1. The pairwise comparison matrix for geomorphology

| Geomorphology                            | 1           | 2           | 3           | 4           | 5           | 6         | 7     | 8           | 9         | 10        | Weights |
|------------------------------------------|-------------|-------------|-------------|-------------|-------------|-----------|-------|-------------|-----------|-----------|---------|
| Swamps and marshes                       | 1/1/1       | 1/1/1       | 1/2/3       | 1/2/3       | 1/1/1       | 4/5/6     | 3/4/5 | 1/2/3       | 3/4/5     | 2/3/4     | 0.170   |
| Rivers                                   | 1/1/1       | 1/1/1       | 1/1/1       | 1/2/3       | 1/1/1       | 4/5/6     | 3/4/5 | 1/2/3       | 3/4/5     | 2/3/4     | 0.157   |
| Oxbow lake - abandoned major meander     | 1/3,1/2,1   | 1/1/1       | 1/1/1       | 1/1/1       | 1/3,1/2,1   | 3/4/5     | 2/3/4 | 1/2/3       | 2/3/4     | 1/2/3     | 0.120   |
| River sand bar                           | 1/3,1/2,1   | 1/3,1/2,1   | 1/1/1       | 1/1/1       | 1/3,1/2,1   | 1/1/1     | 2/3/4 | 1/2/3       | 2/3/4     | 1/2/3     | 0.100   |
| Alluvial plain                           | 1/1/1       | 1/1/1       | 1/2/3       | 1/2/3       | 1/1/1       | 5/6/7     | 4/5/6 | 2/3/4       | 3/4/5     | 2/3/4     | 0.184   |
| Loess plateau                            | 1/6,1/5,1/4 | 1/6,1/5,1/4 | 1/5,1/4,1/3 | 1/1/1       | 1/7,1/6,1/5 | 1/1/1     | 1/2/3 | 1/5,1/4,1/3 | 1/3,1/2,1 | 1/3,1/2,1 | 0.036   |
| Areas of moderate sheet and rill erosion | 1/5,1/4,1/3 | 1/5,1/4,1/3 | 1/4,1/3,1/2 | 1/4,1/3,1/2 | 1/6,1/5,1/4 | 1/3,1/2,1 | 1/1/1 | 1/3,1/2,1   | 1/1/1     | 1/3,1/2,1 | 0.037   |
| Lower river terrace                      | 1/3,1/2,1   | 1/3,1/2,1   | 1/3,1/2,1   | 1/3,1/2,1   | 1/4,1/3,1/2 | 3/4/5     | 1/2/3 | 1/1/1       | 2/3/4     | 1/2/3     | 0.090   |
| Proluvial fan                            | 1/5,1/4,1/3 | 1/5,1/4,1/3 | 1/4,1/3,1/2 | 1/4,1/3,1/2 | 1/5,1/4,1/3 | 1/2/3     | 1/1/1 | 1/4,1/3,1/2 | 1/1/1     | 1/3,1/2,1 | 0.041   |
| Higher river terrace                     | 1/4,1/3,1/2 | 1/4,1/3,1/2 | 1/3,1/2,1   | 1/3,1/2,1   | 1/4,1/3,1/2 | 1/2/3     | 1/2/3 | 1/3,1/2,1   | 1/2/3     | 1/1/1     | 0.065   |

Table S2. The pairwise comparison matrix for geology

| Geology           | 1           | 2           | 3           | 4           | 5           | 6           | 7           | 8           | 9           | 10          | 11          | 12    | 13          | Weights |
|-------------------|-------------|-------------|-------------|-------------|-------------|-------------|-------------|-------------|-------------|-------------|-------------|-------|-------------|---------|
| ap-w              | 1/1/1       | 1/1/1       | 1/1/1       | 1/2/3       | 1/2/3       | 1/2/3       | 1/2/3       | 1/2/3       | 1/2/3       | 1/2/3       | 2/3/4       | 3/4/5 | 1/2/3       | 0.123   |
| ap'               | 1/1/1       | 1/1/1       | 1/1/1       | 1/2/3       | 1/2/3       | 1/2/3       | 1/2/3       | 1/2/3       | 1/2/3       | 1/2/3       | 2/3/4       | 4/5/6 | 3/4/5       | 0.131   |
| ap''              | 1/1/1       | 1/1/1       | 1/1/1       | 1/2/3       | 1/2/3       | 1/2/3       | 1/2/3       | 1/2/3       | 1/2/3       | 1/2/3       | 2/3/4       | 5/6/7 | 3/4/5       | 0.133   |
| Pl <sub>3-3</sub> | 1/3,1/2,1   | 1/3,1/2,1   | 1/3,1/2,1   | 1/1/1       | 1/1/1       | 1/1/1       | 1/1/1       | 1/1/1       | 1/1/1       | 1/1/1       | 1/2/3       | 4/5/6 | 2/3/4       | 0.074   |
| b                 | 1/3,1/2,1   | 1/3,1/2,1   | 1/3,1/2,1   | 1/1/1       | 1/1/1       | 1/1/1       | 1/1/1       | 1/1/1       | 1/1/1       | 1/1/1       | 1/2/3       | 4/5/6 | 2/3/4       | 0.074   |
| a-w               | 1/3,1/2,1   | 1/3,1/2,1   | 1/3,1/2,1   | 1/3,1/2,1   | 1/1/1       | 1/1/1       | 1/1/1       | 1/1/1       | 1/1/1       | 1/1/1       | 1/2/3       | 4/5/6 | 2/3/4       | 0.072   |
| a'                | 1/3,1/2,1   | 1/3,1/2,1   | 1/3,1/2,1   | 1/1/1       | 1/1/1       | 1/1/1       | 1/1/1       | 1/1/1       | 1/1/1       | 1/1/1       | 1/2/3       | 4/5/6 | 2/3/4       | 0.074   |
| al                | 1/3,1/2,1   | 1/3,1/2,1   | 1/3,1/2,1   | 1/1/1       | 1/1/1       | 1/1/1       | 1/1/1       | 1/1/1       | 1/1/1       | 1/1/1       | 1/2/3       | 4/5/6 | 2/3/4       | 0.074   |
| a''               | 1/3,1/2,1   | 1/3,1/2,1   | 1/3,1/2,1   | 1/1/1       | 1/1/1       | 1/1/1       | 1/1/1       | 1/1/1       | 1/1/1       | 1/1/1       | 1/2/3       | 4/5/6 | 2/34        | 0.074   |
| am                | 1/3,1/2,1   | 1/3,1/2,1   | 1/3,1/2,1   | 1/1/1       | 1/1/1       | 1/1/1       | 1/1/1       | 1/1/1       | 1/1/1       | 1/1/1       | 1/2/3       | 4/5/6 | 2/34        | 0.074   |
| ls-w              | 1/4,1/3,1/2 | 1/4,1/3,1/2 | 1/4,1/3,1/2 | 1/3,1/2,1   | 1/3,1/2,1   | 1/3,1/2,1   | 1/3,1/2,1   | 1/3,1/2,1   | 1/3,1/2,1   | 1/3,1/2,1   | 1/1/1       | 3/4/5 | 1/2/3       | 0.048   |
| d                 | 1/5,1/4,1/3 | 1/6,1/5,1/4 | 1/7,1/6,1/5 | 1/6,1/5,1/4 | 1/6,1/5,1/4 | 1/6,1/5,1/4 | 1/6,1/5,1/4 | 1/6,1/5,1/4 | 1/6,1/5,1/4 | 1/6,1/5,1/4 | 1/5,1/4,1/3 | 1/1/1 | 1/4,1/3,1/2 | 0.016   |
| ls-rw             | 1/3,1/2,1   | 1/5,1/4,1/3 | 1/5,1/4,1/3 | 1/4,1/3,1/2 | 1/4,1/3,1/2 | 1/4,1/3,1/2 | 1/4,1/3,1/2 | 1/4,1/3,1/2 | 1/4,1/3,1/2 | 1/4,1/3,1/2 | 1/3,1/2,1   | 2/34  | 1/1/1       | 0.032   |

Table S3. The pairwise comparison matrix for land use/land cover

| Land use/Land cover | 1           | 2           | 3           | 4     | 5     | Weights |
|---------------------|-------------|-------------|-------------|-------|-------|---------|
| Water bodies        | 1/1/1       | 1/2/3       | 2/3/4       | 4/5/6 | 7/8/9 | 0.419   |
| Wetlands            | 1/3,1/2,1   | 1/1/1       | 1/2/3       | 3/4/5 | 6/7/8 | 0.285   |
| Agriculture areas   | 1/4,1/3,1/2 | 1/3,1/2,1   | 1/1/1       | 2/3/4 | 4/5/6 | 0.179   |
| Forest              | 1/6,1/5,1/4 | 1/5,1/4,1/3 | 1/4,1/3,1/2 | 1/1/1 | 2/3/4 | 0.080   |

|                    |             |             |             |             |       |       |
|--------------------|-------------|-------------|-------------|-------------|-------|-------|
| Artificial surface | 1/9,1/8,1/7 | 1/8,1/7,1/6 | 1/6,1/5,1/4 | 1/4,1/3,1/2 | 1/1/1 | 0.037 |
|--------------------|-------------|-------------|-------------|-------------|-------|-------|

Table S4. The pairwise comparison matrix for drainage density

| Drainage density<br>(km/km²) | 1           | 2           | 3         | 4     | Weights |
|------------------------------|-------------|-------------|-----------|-------|---------|
| 0-1                          | 1/1/1       | 1/2/3       | 3/4/5     | 5/6/7 | 0.496   |
| 1-2                          | 3/1, 2/1,1  | 1/1/1       | 1/2/3     | 3/4/5 | 0.284   |
| 2-3                          | 1/5,1/4/1/3 | 1/3,1/2,1   | 1/1/1     | 1/2/3 | 0.143   |
| 3-4                          | 1/7,1/6,1/5 | 1/5,1/4,1/3 | 1/3,1/2,1 | 1/1/1 | 0.077   |

Table S5. The pairwise comparison matrix for slope

| Slope    | 1           | 2           | 3     | Weights |
|----------|-------------|-------------|-------|---------|
| Flat     | 1/1/1       | 4/5/6       | 9/9/9 | 0.732   |
| Moderate | 1/6,1/5,1/4 | 1/1/1       | 4/5/6 | 0.210   |
| Steep    | 9/9/9       | 1/6,1/5,1/4 | 1/1/1 | 0.058   |

Table S6. The pairwise comparison matrix for soil

| Soil                                        | 1           | 2           | 3           | 4           | 5           | 6           | 7           | 8           | 9           | 10          | 11          | 12          |
|---------------------------------------------|-------------|-------------|-------------|-------------|-------------|-------------|-------------|-------------|-------------|-------------|-------------|-------------|
| 1. Haplic Fluvisol (Sodic)                  | 1/1/1       | 1/1/1       | 1/2/3       | 1/3,1/2,1   | 1/2/3       | 2/3/4       | 1/1/1       | 1/1/1       | 1/3,1/2,1   | 4/5/6       | 1/2/3       | 2/3/4       |
| 2. Haplic Fluvisol (Eutric, Siltic)         | 1/1/1       | 1/1/1       | 2/3/4       | 1/3,1/2,1   | 1/1/1       | 2/3/4       | 1/1/1       | 1/1/1       | 1/3,1/2,1   | 4/5/6       | 1/2/3       | 2/3/4       |
| 3. Haplic Fluvisol (Arenic)                 | 1/4,1/3,1/2 | 1/4,1/3,1/2 | 1/1/1       | 1/5,1/4,1/3 | 1/4,1/3,1/2 | 1/1/1       | 1/4,1/3,1/2 | 1/4,1/3,1/2 | 1/5,1/4,1/3 | 2/3/4       | 1/3,1/2,1   | 1/1/1       |
| 4. Stagnic Fluvisol                         | 1/2/3       | 1/1/1       | 3/4/5       | 1/1/1       | 1/2/3       | 3/4/5       | 1/2/3       | 1/2/3       | 1/1/1       | 5/6/7       | 2/3/4       | 3/4/5       |
| 5. Mollic Gleysol (Novic)                   | 1/1/1       | 1/1/1       | 2/3/4       | 1/3,1/2,1   | 1/1/1       | 2/3/4       | 1/1/1       | 1/1/1       | 1/3,1/2,1   | 4/5/6       | 1/2/3       | 2/3/4       |
| 6. Luvis Chernozem                          | 1/4,1/3,1/2 | 1/4,1/3,1/2 | 1/1/1       | 1/5,1/4,1/3 | 1/4,1/3,1/2 | 1/1/1       | 1/4,1/3,1/2 | 1/4,1/3,1/2 | 1/5,1/4,1/3 | 2/3/4       | 1/3,1/2,1   | 1/1/1       |
| 7. Calcic Chernozem                         | 1/1/1       | 1/1/1       | 2/3/4       | 1/3,1/2,1   | 1/1/1       | 2/3/4       | 1/1/1       | 1/1/1       | 1/3,1/2,1   | 4/5/6       | 1/2/3       | 2/3/4       |
| 8. Calcic Chernozem (Glossic)               | 1/1/1       | 1/1/1       | 2/3/4       | 1/3,1/2,1   | 1/1/1       | 2/3/4       | 1/1/1       | 1/1/1       | 1/3,1/2,1   | 4/5/6       | 1/2/3       | 2/3/4       |
| 9. Calcic Chernozem                         | 1/2/3       | 1/2/3       | 3/4/5       | 1/1/1       | 1/2/3       | 3/4/5       | 1/2/3       | 1/2/3       | 1/1/1       | 5/6/7       | 2/3/4       | 3/4/5       |
| 10. Haplic Chernozem                        | 1/6,1/5,1/4 | 1/6,1/5,1/4 | 1/4,1/3,1/2 | 1/7,1/6,1/5 | 1/6,1/5,1/4 | 1/4,1/3,1/2 | 1/6,1/5,1/4 | 1/6,1/5,1/4 | 1/7,1/6,1/5 | 1/1/1       | 1/5,1/4,1/3 | 1/4,1/3,1/2 |
| 11. Luvis Chernozem                         | 1/3,1/2,1   | 1/3,1/2,1   | 1/2/3       | 1/4,1/3,1/2 | 1/3,1/2,1   | 1/2/3       | 1/3,1/2,1   | 1/3,1/2,1   | 1/4,1/3,1/2 | 3/4/5       | 1/1/1       | 1/2/3       |
| 12. Luvis Chernozem                         | 1/4,1/3,1/2 | 1/4,1/3,1/2 | 1/1/1       | 1/5,1/4,1/3 | 1/4,1/3,1/2 | 1/1/1       | 1/4,1/3,1/2 | 1/4,1/3,1/2 | 1/5,1/4,1/3 | 2/3/4       | 1/3,1/2,1   | 1/1/1       |
| 13. Colluvic Regosol (Calcaric)             | 1/6,1/5,1/4 | 1/6,1/5,1/4 | 1/4,1/3,1/2 | 1/7,1/6,1/5 | 1/6,1/5,1/4 | 1/4,1/3,1/2 | 1/6,1/5,1/4 | 1/6,1/5,1/4 | 1/7,1/6,1/5 | 1/1/10      | 1/5,1/4,1/3 | 1/4,1/3,1/2 |
| 14. Haplic Regosol (Calcaric, Siltic)       | 1/7,1/6,1/5 | 1/7,1/6,1/5 | 1/5,1/4,1/3 | 1/7,1/6,1/5 | 1/7,1/6,1/5 | 1/5,1/4,1/3 | 1/7,1/6,1/5 | 1/7,1/6,1/5 | 1/7,1/6,1/5 | 1/3,1/2,1   | 1/6,1/5,1/4 | 1/5,1/4,1/3 |
| 15. Calcic Chernozem                        | 1/1/1       | 1/1/1       | 2/3/4       | 1/3,1/2,1   | 1/1/1       | 2/3/4       | 1/1/1       | 1/1/1       | 1/3,1/2,1   | 4/5/6       | 1/2/3       | 2/3/4       |
| 16. Gleyic Phaeozem (Pachic, Endosalic)     | 1/1/1       | 1/1/1       | 2/3/4       | 1/3,1/2,1   | 1/1/1       | 2/3/4       | 1/1/1       | 1/1/1       | 1/3,1/2,1   | 4/5/6       | 1/2/3       | 2/3/4       |
| 17. Haplic Gleysol                          | 1/2/3       | 1/2/3       | 1/2/3       | 1/1/1       | 1/2/3       | 1/2/3       | 1/2/3       | 1/2/3       | 1/1/1       | 5/6/7       | 2/3/4       | 1/2/3       |
| 18. Mollic Gleysol (Clayic)                 | 1/4,1/3,1/2 | 1/4,1/3,1/2 | 1/1/1       | 1/5,1/4,1/3 | 1/4,1/3,1/2 | 1/1/1       | 1/4,1/3,1/2 | 1/4,1/3,1/2 | 1/5,1/4,1/3 | 2/3/4       | 1/3,1/2,1   | 1/1/1       |
| 19. Mollic Gleysol (Calcaric)               | 1/5,1/4,1/3 | 1/5,1/4,1/3 | 1/3,1/2,1   | 1/6,1/5,1/4 | 1/5,1/4,1/3 | 1/3,1/2,1   | 1/5,1/4,1/3 | 1/5,1/4,1/3 | 1/6,1/5,1/4 | 1/2/3       | 1/4,1/3,1/2 | 1/3,1/2,1   |
| 20. Mollic Gleysol (Calcaric, Arenic)       | 1/6,1/5,1/4 | 1/6,1/5,1/4 | 1/4,1/3,1/2 | 1/7,1/6,1/5 | 1/6,1/5,1/4 | 1/4,1/3,1/2 | 1/6,1/5,1/4 | 1/6,1/5,1/4 | 1/7,1/6,1/5 | 1/1/1       | 1/5,1/4,1/3 | 1/4,1/3,1/2 |
| 21. Mollic Gleysol (Clayic)                 | 1/6,1/5,1/4 | 1/6,1/5,1/4 | 1/4,1/3,1/2 | 1/7,1/6,1/5 | 1/6,1/5,1/4 | 1/4,1/3,1/2 | 1/6,1/5,1/4 | 1/6,1/5,1/4 | 1/7,1/6,1/5 | 1/1/1       | 1/5,1/4,1/3 | 1/4,1/3,1/2 |
| 22. Endosalic Mollic Gleysol (Clayic)       | 1/6,1/5,1/4 | 1/6,1/5,1/4 | 1/4,1/3,1/2 | 1/7,1/6,1/5 | 1/6,1/5,1/4 | 1/4,1/3,1/2 | 1/6,1/5,1/4 | 1/6,1/5,1/4 | 1/7,1/6,1/5 | 1/1/1       | 1/5,1/4,1/3 | 1/4,1/3,1/2 |
| 23. Endosalic Mollic Gleysol Sodic, Cleyic) | 1/6,1/5,1/4 | 1/6,1/5,1/4 | 1/4,1/3,1/2 | 1/7,1/6,1/5 | 1/6,1/5,1/4 | 1/4,1/3,1/2 | 1/6,1/5,1/4 | 1/6,1/5,1/4 | 1/7,1/6,1/5 | 1/1/1       | 1/5,1/4,1/3 | 1/4,1/3,1/2 |
| 24. Solonchak                               | 1/7,1/6,1/5 | 1/7,1/6,1/5 | 1/5,1/4,1/3 | 1/8,1/7,1/6 | 1/7,1/6,1/5 | 1/5,1/4,1/3 | 1/7,1/6,1/5 | 1/7,1/6,1/5 | 1/8,1/7,1/6 | 1/3,1/2,1   | 1/6,1/5,1/4 | 1/5,1/4,1/3 |
| 25. Solonetz                                | 1/9,1/8,1/7 | 1/9,1/8,1/7 | 1/7,1/6,1/5 | 9/9/9       | 1/9,1/8,1/7 | 1/7,1/6,1/5 | 1/9,1/8,1/7 | 1/9,1/8,1/7 | 9/9/9       | 1/5,1/4,1/3 | 1/8,1/7,1/6 | 1/7,1/6,1/5 |

| Soil | 13        | 14    | 15          | 16          | 17          | 18          | 19          | 20        | 21        | 22        | 23        | 24    | 25    | Weights |
|------|-----------|-------|-------------|-------------|-------------|-------------|-------------|-----------|-----------|-----------|-----------|-------|-------|---------|
| 1    | 4/5/6     | 5/6/7 | 1/1/1       | 1/1/1       | 1/3,1/2,1   | 2/3/4       | 3/4/5       | 4/5/6     | 4/5/6     | 4/5/6     | 4/5/6     | 5/6/7 | 7/8/9 | 0.067   |
| 2    | 4/5/6     | 5/6/7 | 1/1/1       | 1/1/1       | 1/3,1/2,1   | 2/3/4       | 3/4/5       | 4/5/6     | 4/5/6     | 4/5/6     | 4/5/6     | 5/6/7 | 7/8/9 | 0.056   |
| 3    | 2/3/4     | 3/4/5 | 1/4,1/3,1/2 | 1/4,1/3,1/2 | 1/3,1/2,1   | 1/1/1       | 1/2/3       | 2/3/4     | 2/3/4     | 2/3/4     | 2/3/4     | 3/4/5 | 5/6/7 | 0.038   |
| 4    | 5/6/7     | 5/6/7 | 1/2/3       | 1/2/3       | 1/1/1       | 3/4/5       | 4/5/6       | 5/6/7     | 5/6/7     | 5/6/7     | 5/6/7     | 6/7/8 | 9/9/9 | 0.067   |
| 5    | 4/5/6     | 5/6/7 | 1/1/1       | 1/1/1       | 1/3,1/2,1   | 2/3/4       | 3/4/5       | 4/5/6     | 4/5/6     | 4/5/6     | 4/5/6     | 5/6/7 | 7/8/9 | 0.056   |
| 6    | 2/3/4     | 3/4/5 | 1/4,1/3,1/2 | 1/4,1/3,1/2 | 1/3,1/2,1   | 1/1/1       | 1/2/3       | 2/3/4     | 2/3/4     | 2/3/4     | 2/3/4     | 3/4/5 | 5/6/7 | 0.038   |
| 7    | 4/5/6     | 5/6/7 | 1/1/1       | 1/1/1       | 1/3,1/2,1   | 2/3/4       | 3/4/5       | 4/5/6     | 4/5/6     | 4/5/6     | 4/5/6     | 5/6/7 | 7/8/9 | 0.056   |
| 8    | 4/5/6     | 5/6/7 | 1/1/1       | 1/1/1       | 1/3,1/2,1   | 2/3/4       | 3/4/5       | 4/5/6     | 4/5/6     | 4/5/6     | 4/5/6     | 5/6/7 | 7/8/9 | 0.056   |
| 9    | 5/6/7     | 5/6/7 | 1/2/3       | 1/2/3       | 1/1/1       | 3/4/5       | 4/5/6       | 5/6/7     | 5/6/7     | 5/6/7     | 5/6/7     | 6/7/8 | 9/9/9 | 0.067   |
| 10   | 1/1/1     | 1/2/3 | 1/6,1/5,1/4 | 1/6,1/5,1/4 | 1/7,1/6,1/5 | 1/4,1/3,1/2 | 1/3,1/2,1   | 1/1/1     | 1/1/1     | 1/1/1     | 1/1/1     | 1/2/3 | 3/4/5 | 0.022   |
| 11   | 3/4/5     | 4/5/6 | 1/3,1/2,1   | 1/3,1/2,1   | 1/4,1/3,1/2 | 1/2/3       | 2/3/4       | 3/4/5     | 3/4/5     | 3/4/5     | 3/4/5     | 4/5/6 | 6/7/8 | 0.045   |
| 12   | 2/3/4     | 3/4/5 | 1/4,1/3,1/2 | 1/4,1/3,1/2 | 1/3,1/2,1   | 1/1/1       | 1/2/3       | 2/3/4     | 2/3/4     | 2/3/4     | 2/3/4     | 3/4/5 | 5/6/7 | 0.038   |
| 13   | 1/1/1     | 1/2/3 | 1/6,1/5,1/4 | 1/6,1/5,1/4 | 1/7,1/6,1/5 | 1/4,1/3,1/2 | 1/3,1/2,1   | 1/1/1     | 1/1/1     | 1/1/1     | 1/1/1     | 1/2/3 | 3/4/5 | 0.022   |
| 14   | 1/3,1/2,1 | 1/1/1 | 1/7,1/6,1/5 | 1/7,1/6,1/5 | 1/8,1/7,1/6 | 1/5,1/4,1/3 | 1/4,1/3,1/2 | 1/3,1/2,1 | 1/3,1/2,1 | 1/3,1/2,1 | 1/3,1/2,1 | 1/1/1 | 2/3/4 | 0.018   |
| 15   | 4/5/6     | 5/6/7 | 1/1/1       | 1/1/1       | 1/3,1/2,1   | 2/3/4       | 3/4/5       | 4/5/6     | 4/5/6     | 4/5/6     | 4/5/6     | 5/6/7 | 7/8/9 | 0.056   |
| 16   | 4/5/6     | 5/6/7 | 1/1/1       | 1/1/1       | 1/3,1/2,1   | 2/3/4       | 3/4/5       | 4/5/6     | 4/5/6     | 4/5/6     | 4/5/6     | 5/6/7 | 7/8/9 | 0.056   |
| 17   | 5/6/7     | 6/7/8 | 1/2/3       | 1/2/3       | 1/1/1       | 3/4/5       | 4/5/6       | 5/6/7     | 5/6/7     | 5/6/7     | 5/6/7     | 6/7/8 | 9/9/9 | 0.065   |
| 18   | 2/3/4     | 3/4/5 | 1/4,1/3,1/2 | 1/4,1/3,1/2 | 1/5,1/4,1/3 | 1/1/1       | 1/2/3       | 2/3/4     | 2/3/4     | 2/3/4     | 2/3/4     | 3/4/5 | 5/6/7 | 0.035   |

|    |             |             |             |             |             |             |             |             |             |             |             |             |       |       |
|----|-------------|-------------|-------------|-------------|-------------|-------------|-------------|-------------|-------------|-------------|-------------|-------------|-------|-------|
| 19 | 1/2/3       | 2/3/4       | 1/5,1/4,1/3 | 1/5,1/4,1/3 | 1/6,1/5,1/4 | 1/3,1/2,1   | 1/1/1       | 1/2/3       | 1/1/1       | 1/1/1       | 1/1/1       | 2/3/4       | 4/5/6 | 0.026 |
| 20 | 1/1/1       | 1/2/3       | 1/6,1/5,1/4 | 1/6,1/5,1/4 | 1/7,1/6,1/5 | 1/4,1/3,1/2 | 1/3,1/2,1   | 1/1/1       | 1/1/1       | 1/1/1       | 1/1/1       | 1/2/3       | 3/4/5 | 0.022 |
| 21 | 1/1/1       | 1/2/3       | 1/6,1/5,1/4 | 1/6,1/5,1/4 | 1/7,1/6,1/5 | 1/4,1/3,1/2 | 1/1/1       | 1/1/1       | 1/1/1       | 1/1/1       | 1/1/1       | 1/2/3       | 3/4/5 | 0.022 |
| 22 | 1/1/1       | 1/2/3       | 1/6,1/5,1/4 | 1/6,1/5,1/4 | 1/7,1/6,1/5 | 1/4,1/3,1/2 | 1/1/1       | 1/1/1       | 1/1/1       | 1/1/1       | 1/1/1       | 1/3,1/2,1   | 3/4/5 | 0.021 |
| 23 | 1/1/1       | 1/2/3       | 1/6,1/5,1/4 | 1/6,1/5,1/4 | 1/7,1/6,1/5 | 1/4,1/3,1/2 | 1/1/1       | 1/1/1       | 1/1/1       | 1/1/1       | 1/1/1       | 1/2/3       | 3/4/5 | 0.022 |
| 24 | 1/3,1/2,1   | 1/1/1       | 1/7,1/6,1/5 | 1/7,1/6,1/5 | 1/8,1/7,1/6 | 1/5,1/4,1/3 | 1/4,1/3,1/2 | 1/3,1/2,1   | 1/3,1/2,1   | 1/2/3       | 1/3,1/2,1   | 1/1/1       | 2/3/4 | 0.018 |
| 25 | 1/5,1/4,1/3 | 1/4,1/3,1/2 | 1/9,1/8,1/7 | 1/9,1/8,1/7 | 9/9/9       | 1/7,1/6,1/5 | 1/6,1/5,1/4 | 1/5,1/4,1/3 | 1/5,1/4,1/3 | 1/5,1/4,1/3 | 1/5,1/4,1/3 | 1/4,1/3,1/2 | 1/1/1 | 0.011 |

**Table S7.** The comparison of normalized AHP and normalized FAHP weights

| Theme         | Features/class                           | AHP<br>weight for<br>features | FAHP<br>weight for<br>features | AHP<br>weight for<br>theme (%) | FAHP<br>weight for<br>theme (%) |
|---------------|------------------------------------------|-------------------------------|--------------------------------|--------------------------------|---------------------------------|
| Geomorphology | swamps and marshes                       | 0.177                         | 0.170                          | 29.73%                         | 29.21%                          |
|               | river                                    | 0.165                         | 0.157                          |                                |                                 |
|               | oxbow lake-abandoned major meander       | 0.119                         | 0.120                          |                                |                                 |
|               | river sand bar                           | 0.096                         | 0.100                          |                                |                                 |
|               | alluvial plain                           | 0.191                         | 0.184                          |                                |                                 |
|               | loess plateau                            | 0.036                         | 0.036                          |                                |                                 |
|               | areas of moderate sheet and rill erosion | 0.035                         | 0.037                          |                                |                                 |
|               | lower river terrace                      | 0.083                         | 0.090                          |                                |                                 |
|               | proluvial fan                            | 0.039                         | 0.041                          |                                |                                 |
|               | higher river terrace                     | 0.060                         | 0.065                          |                                |                                 |
| Soil          | Haplic Fluvisol (Sodic)                  | 0.064                         | 0.067                          | 26.04%                         | 26.35%                          |
|               | Haplic Fluvisol (Eutric, Siltic)         | 0.064                         | 0.056                          |                                |                                 |
|               | Haplic Fluvisol (Arenic)                 | 0.029                         | 0.038                          |                                |                                 |
|               | Stagnic Fluvisol                         | 0.093                         | 0.067                          |                                |                                 |
|               | Molic Gleysol (Novic)                    | 0.064                         | 0.056                          |                                |                                 |
|               | Luvic Chernozem                          | 0.029                         | 0.038                          |                                |                                 |
|               | Calcic Chernozem                         | 0.064                         | 0.056                          |                                |                                 |
|               | Calcic Chernozem (Glossic)               | 0.064                         | 0.056                          |                                |                                 |
|               | Calcic Chernozem                         | 0.096                         | 0.067                          |                                |                                 |
|               | Haplic Chernozem                         | 0.013                         | 0.022                          |                                |                                 |
|               | Luvic Chernozem                          | 0.042                         | 0.045                          |                                |                                 |
|               | Luvic Chernozem                          | 0.029                         | 0.038                          |                                |                                 |
|               | Colluvic Regosol (Calcaric)              | 0.013                         | 0.022                          |                                |                                 |
|               | Haplic Regosol (Calcaric, Siltic)        | 0.009                         | 0.018                          |                                |                                 |
|               | Calcic Chernozem                         | 0.064                         | 0.056                          |                                |                                 |
|               | Gleyic Phaeozem (Pachic, Endosalic)      | 0.064                         | 0.056                          |                                |                                 |
|               | Haplic Gleysol                           | 0.088                         | 0.065                          |                                |                                 |
|               | Mollic Gleysol (Clayic)                  | 0.028                         | 0.035                          |                                |                                 |
|               | Mollic Gleysol (Calcaric)                | 0.018                         | 0.026                          |                                |                                 |
|               | Mollic Gleysol (Calcaric, Arenic)        | 0.013                         | 0.022                          |                                |                                 |
|               | Mollic Gleysol (Clayic)                  | 0.013                         | 0.022                          |                                |                                 |
|               | Endosalic Mollic Gleysol (Clayic)        | 0.013                         | 0.021                          |                                |                                 |
|               | Endosalic Mollic Gleysol Sodic, Cleyic)  | 0.013                         | 0.022                          |                                |                                 |
|               | Solonchak                                | 0.009                         | 0.018                          |                                |                                 |
|               | Solonetz                                 | 0.005                         | 0.011                          |                                |                                 |
| Geologija     | ap-w                                     | 0.127                         | 0.123                          | 22.70%                         | 21.18%                          |
|               | ap'                                      | 0.133                         | 0.131                          |                                |                                 |
|               | ap"                                      | 0.134                         | 0.133                          |                                |                                 |
|               | Pl2+3                                    | 0.074                         | 0.074                          |                                |                                 |
|               | b                                        | 0.074                         | 0.074                          |                                |                                 |
|               | a-w                                      | 0.074                         | 0.072                          |                                |                                 |
|               | a'                                       | 0.074                         | 0.074                          |                                |                                 |
|               | al                                       | 0.074                         | 0.074                          |                                |                                 |
|               | a"                                       | 0.074                         | 0.074                          |                                |                                 |

|          |                    |       |       |        |        |
|----------|--------------------|-------|-------|--------|--------|
|          | alm                | 0.074 | 0.074 |        |        |
|          | ls-w               | 0.042 | 0.048 |        |        |
|          | ls-rw              | 0.031 | 0.032 |        |        |
|          | d                  | 0.017 | 0.016 |        |        |
| LULC     | water bodies       | 0.432 | 0.419 |        |        |
|          | wetlands           | 0.278 | 0.285 |        |        |
|          | agriculture areas  | 0.173 | 0.179 | 10.23% | 10.87% |
|          | forest             | 0.079 | 0.080 |        |        |
|          | artificial surface | 0.038 | 0.037 |        |        |
| Slope    | flat (0-3)         | 0.520 | 0.530 |        |        |
|          | gentle (3-9)       | 0.209 | 0.202 |        |        |
|          | moderate (9-18)    | 0.142 | 0.139 | 6.55%  | 7.30%  |
|          | steep (18-25)      | 0.097 | 0.093 |        |        |
|          | very steep (25-31) | 0.033 | 0.036 |        |        |
| Drainage | very low (0-1)     | 0.513 | 0.496 |        |        |
|          | low (1-2)          | 0.275 | 0.284 | 4.75%  | 5.08%  |
|          | moderate (2-3)     | 0.138 | 0.143 |        |        |
|          | very high (3-3.84) | 0.074 | 0.077 |        |        |
